# Supplementary material for: Robot-assisted rehabilitation for total knee or hip replacement surgery patients: A systematic review and meta-analysis
Source: PubMed Central journal article supplement — Medicine (Baltimore). 2022 Oct 7;101(40):e30852. doi: 10.1097/MD.0000000000030852 (PMC9543030; doi:10.1097/md.0000000000030852), 2022-10-07
Supplement: medi-101-e30852-s001.pdf [file medi-101-e30852-s001.pdf]

| Database                                       | Detailed search strategies                                                                                                                                                                                                                                                                                                                                                                                                                                                                                                                                                                                                                                                                                                                                                                                                                                                                                       | Records founded |
|------------------------------------------------|------------------------------------------------------------------------------------------------------------------------------------------------------------------------------------------------------------------------------------------------------------------------------------------------------------------------------------------------------------------------------------------------------------------------------------------------------------------------------------------------------------------------------------------------------------------------------------------------------------------------------------------------------------------------------------------------------------------------------------------------------------------------------------------------------------------------------------------------------------------------------------------------------------------|-----------------|
| MEDLINE/PUBMED                                 | ((((rehabilitation) AND hybrid) AND total hip arthroplasty)) OR (((rehabilitation) AND total knee arthroplasty) AND hybrid)) OR (((hybrid) AND total knee arthroplasty) AND robot rehabilitation)) OR ((hybrid) AND robot rehabilitation)                                                                                                                                                                                                                                                                                                                                                                                                                                                                                                                                                                                                                                                                        | 121             |
| EMBASE                                         | 'rehabilitation'/exp OR rehabilitation) AND ('hybrid'/exp OR hybrid) AND ('total hip arthroplasty'/exp OR 'total hip arthroplasty' OR (('total'/exp OR total) AND ('hip'/exp OR hip) AND ('arthroplasty'/exp OR arthroplasty))) OR (('rehabilitation'/exp OR rehabilitation) AND ('total knee arthroplasty'/exp OR 'total knee arthroplasty' OR (('total'/exp OR total) AND ('knee'/exp OR knee) AND ('arthroplasty'/exp OR arthroplasty))) AND ('hybrid'/exp OR hybrid)) OR (('hybrid'/exp OR hybrid) AND ('total knee arthroplasty'/exp OR 'total knee arthroplasty' OR (('total'/exp OR total) AND ('knee'/exp OR knee) AND ('arthroplasty'/exp OR arthroplasty))) AND ('robot rehabilitation' OR (('robot'/exp OR robot) AND ('rehabilitation'/exp OR rehabilitation)))) OR (('hybrid'/exp OR hybrid) AND ('robot rehabilitation' OR (('robot'/exp OR robot) AND ('rehabilitation'/exp OR rehabilitation)))) | 205             |
| Cochrane Central Register of Controlled Trials | 'rehabilitation'/exp OR rehabilitation) AND ('hybrid'/exp OR hybrid) AND ('total hip arthroplasty'/exp OR 'total hip arthroplasty' OR (('total'/exp OR total) AND ('hip'/exp OR hip) AND ('arthroplasty'/exp OR arthroplasty))) OR (('rehabilitation'/exp OR rehabilitation) AND ('total knee arthroplasty'/exp OR 'total knee arthroplasty' OR (('total'/exp OR total) AND ('knee'/exp OR knee) AND ('arthroplasty'/exp OR arthroplasty))) AND ('hybrid'/exp OR hybrid)) OR (('hybrid'/exp OR hybrid) AND ('total knee arthroplasty'/exp OR                                                                                                                                                                                                                                                                                                                                                                     | 43              |

|  |                                                                                                                                                                                                                                                                                                                                                                     |  |
|--|---------------------------------------------------------------------------------------------------------------------------------------------------------------------------------------------------------------------------------------------------------------------------------------------------------------------------------------------------------------------|--|
|  | 'total knee arthroplasty' OR (('total'/exp OR total) AND ('knee'/exp OR knee) AND ('arthroplasty'/exp OR arthroplasty))) AND ('robot rehabilitation' OR (('robot'/exp OR robot) AND ('rehabilitation'/exp OR rehabilitation)))) OR (('hybrid'/exp OR hybrid) AND ('robot rehabilitation' OR (('robot'/exp OR robot) AND ('rehabilitation'/exp OR rehabilitation)))) |  |
|--|---------------------------------------------------------------------------------------------------------------------------------------------------------------------------------------------------------------------------------------------------------------------------------------------------------------------------------------------------------------------|--|
